# Supplementary material for: Urinary exosomal long noncoding RNAs serve as biomarkers for early detection of non-small cell lung cancer
Source: Oxford University Press journal article supplement (doi:10.1042/bsr20210908), 2021-09-28
Supplement: bsr-2021-0908_supp.pdf [file bsr-2021-0908_supp.pdf]

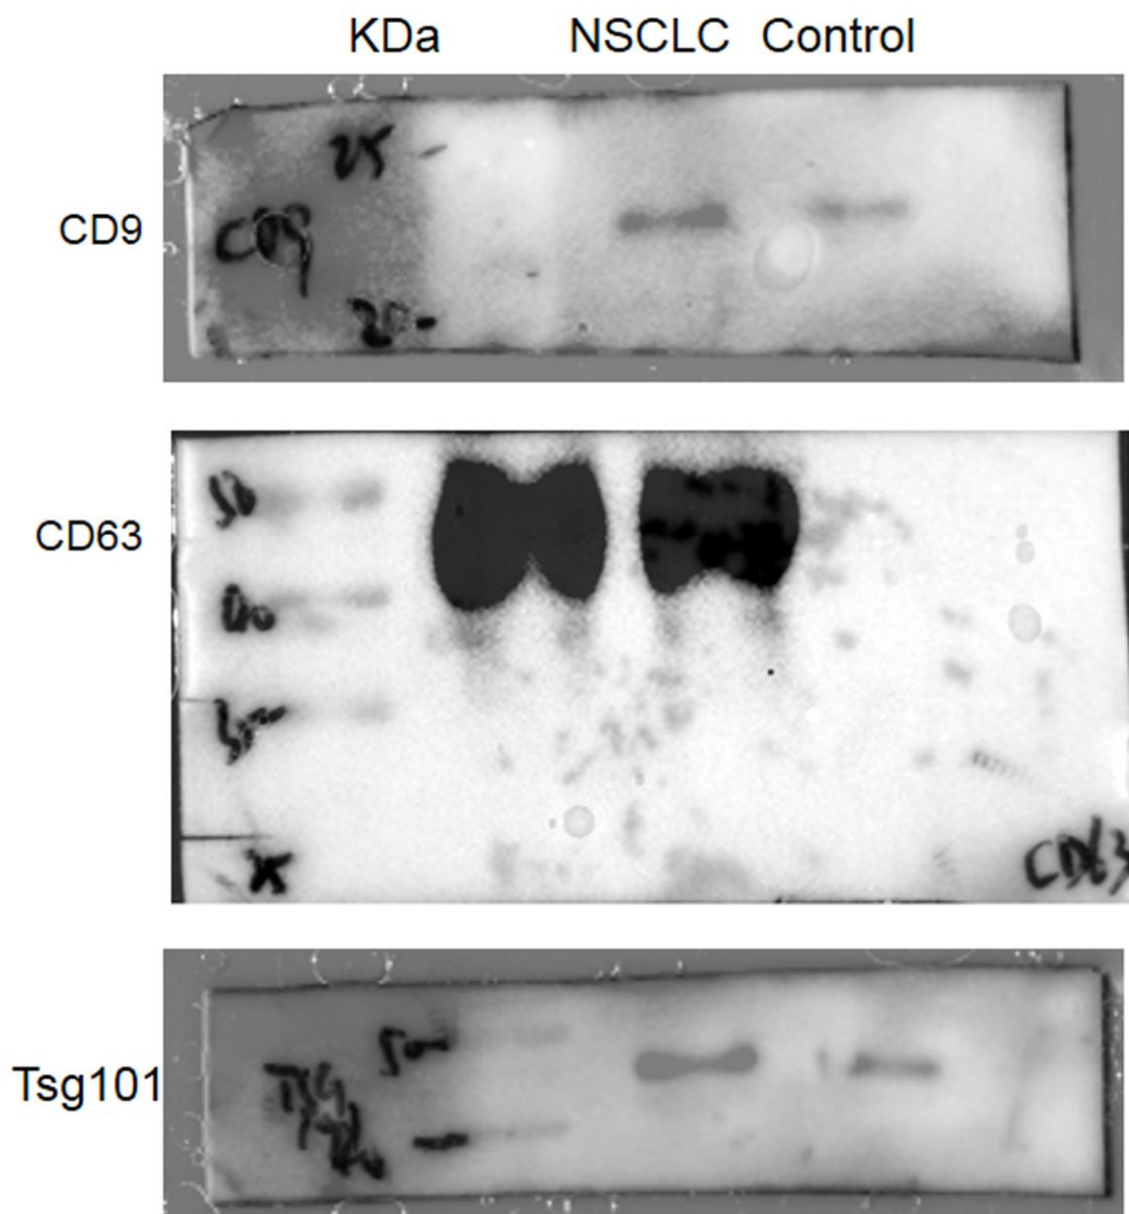

**Figure S1. Western blot results of CD63, CD9, and Tsg101.** Full uncropped and unedited versions of the western blots. Lane 1: protein ladder, Lane 2: NSCLC patient sample, Lane 3: healthy control sample.

### Melt Curve

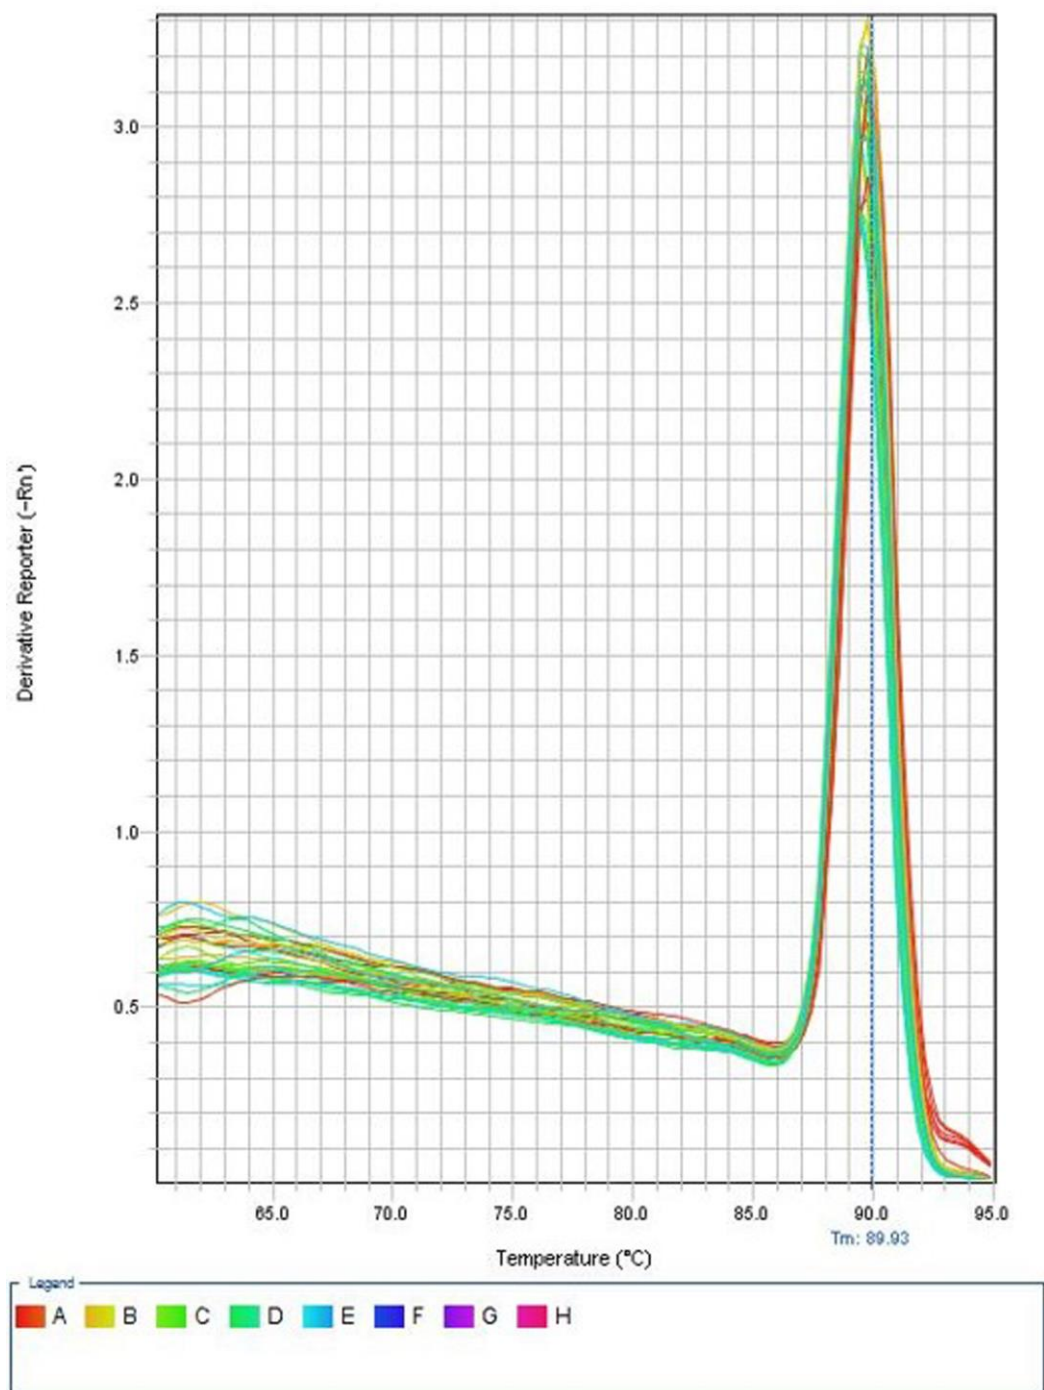

Figure S2. Melting Curve of Inc-FRAT1-5. There is no impurity peak in the melting curve.

**Table S1.** Clinical characteristics of NSCLC patients and healthy controls of Figure 2.

| <b>Study groups</b>     | <b>Gender</b> | <b>Age</b> | <b>Pathological type</b> | <b>Clinical stage</b> |
|-------------------------|---------------|------------|--------------------------|-----------------------|
| <b>NSCLC patients</b>   | Male          | 68         | Squamouscarcinoma        | I+II stage            |
| <b>NSCLC patients</b>   | Male          | 61         | Adenocarcinoma           | III+IV stage          |
| <b>NSCLC patients</b>   | Female        | 65         | Adenocarcinoma           | I+II stage            |
| <b>healthy controls</b> | Male          | 52         |                          |                       |
| <b>healthy controls</b> | Male          | 59         |                          |                       |
| <b>healthy controls</b> | Female        | 61         |                          |                       |

**Table S2.** 100 Differential expression lncRNAs of urinary exosomes in NSCLC patients and controls.

| ProbeName                 | log2FoldChange | regulation | pval | GeneName                                  | Chr   |
|---------------------------|----------------|------------|------|-------------------------------------------|-------|
| CUST_3264_PI437859739     | -0.08          | down       | 0.00 | lnc-SDR39U1-1                             | chr14 |
| A_33_P3329462             | -0.12          | down       | 0.00 | DLEU1 antisense RNA 1                     | chr13 |
| CUST_4353_PI438111429     | -0.18          | down       | 0.00 | PAOX                                      | chr10 |
| CUST_2784_PI437845420     | -0.22          | down       | 0.00 | lnc-TMEM184C-5                            | chr4  |
| CUST_6019_PI437845250111  | -0.16          | down       | 0.00 | LINC00969                                 | chr3  |
| CUST_2130_PI437944915     | -0.29          | down       | 0.00 | lnc-DPH2-1                                | chr1  |
| CUST_18526_PI437845250111 | -0.18          | down       | 0.00 | CTD-2528A14.1                             | chr19 |
| A_21_P0008815             | -0.08          | down       | 0.00 | lnc-C15orf2-1:1                           | chr15 |
| A_22_P00013297            | -0.35          | down       | 0.00 | lnc-RP11-1105G2.3.1-2:1                   | chr12 |
| CUST_22164_PI437845420    | -0.13          | down       | 0.00 |                                           | chr10 |
| CUST_13585_PI437845420    | 0.64           | up         | 0.00 | lnc-FRAT1-5                               | chr10 |
| CUST_2587_PI437859739     | -0.09          | down       | 0.00 | lnc-TRPC4-2                               | chr13 |
| A_22_P00007505            | -0.10          | down       | 0.00 | lnc-GYPA-1:1                              | chr4  |
| A_21_P0010215             | -0.07          | down       | 0.00 | uncharacterized<br>LOC101928576           | chr21 |
| A_21_P0011416             | -0.08          | down       | 0.00 |                                           | chr16 |
| CUST_16654_PI437845424    | 1.01           | up         | 0.00 |                                           | chr5  |
| CUST_10328_PI437845424    | -0.10          | down       | 0.00 |                                           | chr2  |
| A_33_P3343820             | -0.07          | down       | 0.00 | long intergenic<br>non-protein coding RNA | chrX  |
|                           |                |            |      | 632                                       |       |
| CUST_9192_PI437845420     | 0.20           | up         | 0.00 | lnc-GARNL3-2                              | chr9  |
| CUST_1452_PI437859739     | -0.03          | down       | 0.00 | lnc-HDAC7-1                               | chr12 |
| CUST_596_PI437845424      | -0.04          | down       | 0.00 |                                           | chr11 |
| CUST_2235_PI437845424     | -0.05          | down       | 0.00 |                                           | chr12 |
| A_33_P3386770             | -0.24          | down       | 0.00 | lnc-MAPK15-3:3                            | chr8  |
| CUST_13340_PI437845420    | 0.13           | up         | 0.00 | lnc-KCNMB2-11                             | chr3  |
| CUST_7598_PI437859739     | -0.27          | down       | 0.00 | lnc-VRK3-1                                | chr19 |
| CUST_6877_PI437859739     | -0.07          | down       | 0.00 | lnc-ELAVL1-1                              | chr19 |
| CUST_21277_PI437845420    | -0.25          | down       | 0.00 |                                           | chr1  |
| CUST_1809_PI437845420     | -0.66          | down       | 0.00 | lnc-DGKQ-1                                | chr4  |
| CUST_9229_PI437859739     | -0.58          | down       | 0.00 | lnc-ARL6IP6-4                             | chr2  |
| CUST_1162_PI437956274     | -0.25          | down       | 0.00 | TMPRSS4                                   | chr11 |
| CUST_3265_PI437859739     | -0.40          | down       | 0.00 | lnc-RP11-80A15.1.1-2                      | chr14 |
| CUST_8505_PI437845420     | -0.25          | down       | 0.00 | lnc-C9ORF123-7                            | chr9  |
| CUST_625_PI437944915      | -0.05          | down       | 0.00 | PRR36                                     | chr19 |
| CUST_4271_PI437845420     | 0.12           | up         | 0.00 | lnc-ITK-2                                 | chr5  |
| A_19_P00317168            | -0.15          | down       | 0.00 |                                           | chr10 |
| CUST_6705_PI437845420     | -0.11          | down       | 0.00 | lnc-GNGT1-2                               | chr7  |
| CUST_7409_PI437859739     | -0.23          | down       | 0.00 | lnc-PRR19-1                               | chr19 |
| CUST_5480_PI438111429     | -0.14          | down       | 0.00 | lnc-RP11-664121.6.1-1                     | chr11 |

|                           |       |      |      |                                                   |       |
|---------------------------|-------|------|------|---------------------------------------------------|-------|
| CUST_2899_PI437944915     | -0.07 | down | 0.01 | lnc-LYSMD1-3                                      | chr1  |
| CUST_10938_PI437845420    | -0.29 | down | 0.01 | lnc-RP11-105C20.2.1-11                            | chr16 |
| CUST_19112_PI437845420    | -0.08 | down | 0.01 | CAHM                                              | chr6  |
| CUST_8525_PI437845250111  | -0.16 | down | 0.01 | BVES-AS1                                          | chr6  |
| CUST_20092_PI437845250111 | 0.43  | up   | 0.01 | CECR5-AS1                                         | chr22 |
| CUST_14594_PI437845420    | -0.20 | down | 0.01 | lnc-TMCO5A-3                                      | chr15 |
| CUST_22841_PI437845250111 | -0.01 | down | 0.01 | linc-FAM153A-2                                    | chr5  |
| A_22_P00025006            | -0.17 | down | 0.01 | lnc-SHISA9-4:1                                    | chr16 |
| A_22_P00010823            | -0.23 | down | 0.01 | long intergenic<br>non-protein coding RNA<br>1470 | chr5  |
| CUST_17296_PI437845250111 | -0.02 | down | 0.01 | RP11-156P1.3                                      | chr17 |
| CUST_19478_PI437845424    | -0.25 | down | 0.01 |                                                   | chr7  |
| CUST_17215_PI437845424    | -0.44 | down | 0.01 |                                                   | chr6  |
| A_21_P0000741             | -0.10 | down | 0.01 | ADAMTS9 antisense RNA<br>2                        | chr3  |
| CUST_22957_PI437845424    | -0.18 | down | 0.01 |                                                   | chr9  |
| CUST_2402_PI437845420     | -0.36 | down | 0.01 | lnc-HELQ-1                                        | chr4  |
| A_21_P0011909             | -0.08 | down | 0.01 |                                                   | chr2  |
| CUST_7029_PI437859739     | 0.17  | up   | 0.01 | lnc-EPHX3-3                                       | chr19 |
| A_19_P00807507            | -0.05 | down | 0.01 | lnc-MRGPRF-4:2                                    | chr11 |
| CUST_1939_PI437845424     | -0.19 | down | 0.01 |                                                   | chr12 |
| A_21_P0005953             | -0.13 | down | 0.01 | lnc-KHDRBS3-5:4                                   | chr8  |
| CUST_5206_PI437845420     | -0.14 | down | 0.01 | lnc-YIPF3-2                                       | chr6  |
| CUST_17529_PI437845420    | -0.12 | down | 0.01 | lnc-TEC-2                                         | chr4  |
| A_21_P0012140             | -0.09 | down | 0.01 | uncharacterized<br>LOC101926935                   | chr20 |
| CUST_10296_PI437845420    | 0.59  | up   | 0.01 | lnc-SRY-11                                        | chrY  |
| CUST_16886_PI437845250111 | -0.23 | down | 0.01 | AL353997.3                                        | chr17 |
| CUST_20748_PI437845424    | -0.24 | down | 0.01 |                                                   | chr8  |
| CUST_8565_PI437845424     | -0.57 | down | 0.01 |                                                   | chr2  |
| CUST_10704_PI437845424    | -0.30 | down | 0.01 |                                                   | chr20 |
| CUST_11506_PI437845424    | -0.09 | down | 0.01 |                                                   | chr21 |
| CUST_6659_PI437859739     | -0.25 | down | 0.01 | lnc-POLR2E-2                                      | chr19 |
| CUST_6315_PI437845424     | -0.17 | down | 0.01 |                                                   | chr17 |
| CUST_12960_PI437845250111 | -0.09 | down | 0.01 | RP11-831A10.2                                     | chr11 |
| CUST_14229_PI437845250111 | -0.08 | down | 0.01 | RP11-394A14.4                                     | chr13 |
| CUST_19156_PI437845424    | -0.18 | down | 0.01 |                                                   | chr7  |
| CUST_9289_PI437859739     | -0.24 | down | 0.01 | lnc-PSMD14-4                                      | chr2  |
| CUST_14873_PI437845424    | -0.14 | down | 0.01 |                                                   | chr4  |
| CUST_6692_PI437845420     | 0.20  | up   | 0.01 | lnc-ANKIB1-2                                      | chr7  |
| CUST_7763_PI437845250111  | -0.26 | down | 0.01 | MIR143HG                                          | chr5  |
| A_22_P00016230            | -0.07 | down | 0.01 | CATIP antisense RNA 1                             | chr2  |
| CUST_12091_PI437845420    | -0.20 | down | 0.01 | lnc-ARNTL-4                                       | chr11 |

|                          |       |      |      |                                 |       |
|--------------------------|-------|------|------|---------------------------------|-------|
| A_33_P3523501            | 0.09  | up   | 0.01 |                                 | chr19 |
| CUST_14805_PI437845424   | -0.30 | down | 0.01 |                                 | chr4  |
| A_22_P00019021           | 0.09  | up   | 0.01 | lnc-SETDB1-1:1                  | chr1  |
| CUST_22430_PI437845420   | 0.27  | up   | 0.01 |                                 | chr10 |
| CUST_2096_PI437845420    | -0.32 | down | 0.01 | lnc-PTTG2-3                     | chr4  |
| CUST_7738_PI437859739    | -0.23 | down | 0.01 | lnc-FAM71E2-1                   | chr19 |
| A_21_P0005072            | -0.23 | down | 0.01 | lnc-NOX3-2:1                    | chr6  |
| A_21_P0013669            | -0.11 | down | 0.01 | uncharacterized<br>LOC101927993 |       |
| A_21_P0013002            | -0.47 | down | 0.01 |                                 | chr5  |
| CUST_1895_PI437845420    | -0.06 | down | 0.01 | lnc-CYTL1-2                     | chr4  |
| CUST_3081_PI437859739    | 0.48  | up   | 0.01 | lnc-RNASE13-1                   | chr14 |
| CUST_12451_PI437845420   | -0.75 | down | 0.01 | lnc-FAM69C-4                    | chr18 |
| CUST_7974_PI437845424    | -0.08 | down | 0.01 |                                 | chr19 |
| CUST_8082_PI437845250111 | -0.12 | down | 0.01 | ELOVL2-AS1                      | chr6  |
| CUST_2030_PI437944915    | -0.06 | down | 0.01 | lnc-SNIP1-1                     | chr1  |
| A_21_P0009794            | -0.25 | down | 0.01 | lnc-VN1R2-1:2                   | chr19 |
| CUST_14622_PI437845424   | -0.09 | down | 0.01 |                                 |       |
| A_21_P0006966            | -0.27 | down | 0.01 | uncharacterized<br>LOC101928322 | chr10 |
| A_22_P00003087           | -0.12 | down | 0.01 | lnc-C8orf74-1:1                 | chr8  |
| CUST_449_PI437944915     | -0.12 | down | 0.01 | PNMT                            | chr17 |
| CUST_7866_PI437845250111 | -0.14 | down | 0.01 | CTB-174D11.1                    | chr5  |
